# Supplementary material
Source: PubMed Central journal article supplement (PMC7194314)
Supplement: Supp_Table_S1.pdf [file Supp_Table_S1.pdf]

## Supplementary Data

**Supplementary Table S1.** *Distance from the injection site to the pial edge*

| <i>Patient</i> | <i>Anterior Site 1: Left</i> | <i>Anterior Site 1: Right</i> | <i>Intermediate Site 2: Left</i> | <i>Intermediate Site 2: Right</i> | <i>Posterior Site 3: Left</i> | <i>Posterior Site 3: Right</i> |
|----------------|------------------------------|-------------------------------|----------------------------------|-----------------------------------|-------------------------------|--------------------------------|
| 1              | 2.94±0.15                    | 3.39±0.17                     | 3.20±0.37                        | 3.13                              | 5.31±0.64                     | 9.14±0.50                      |
| 2              | 3.62±0.29                    | 5.85±0.65                     | 4.76±0.62                        | 5.54                              | 5.31±0.63                     | 5.34                           |
| 3              | 4.04±0.64                    |                               | 4.63±0.65                        |                                   | 3.25±0.20                     |                                |

To quantify injection accuracy, the shortest distance (mm±standard deviation) from NGF expression at the injection site to the pial edge was measured and averaged among all sections with a detectable injection site. The mean distance was 4.67±1.3 mm; on average, injections were accurately targeted to ~5 mm from the pial edge.

±, 1 standard deviation; NGF, nerve growth factor.
